# Supplementary material
Source: PubMed Central journal article supplement (PMC5712607)
Supplement: 10.1074_M117.808394_jbc.M117.808394-1.pdf [file 10.1074_M117.808394_jbc.M117.808394-1.pdf]

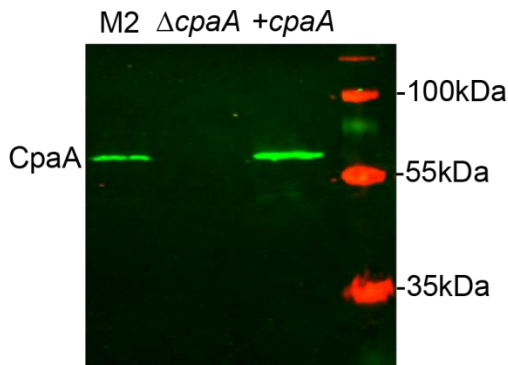

**Figure S1-A. *nosocomialis* CpaA Secretion is Dependent upon *cpaA*.** Supernatants from wildtype M2,  $\Delta cp a A$ , and the complemented strains (*cpaA*+) were analyzed by Western blot analysis probing for CpaA and RNA polymerase for secretion of CpaA. CpaA is detected in the supernatants of wildtype M2 and the complemented  $\Delta cp a A$  strain, indicating CpaA secretion is dependent upon *cpaA*. RNA polymerase was used as a lysis control. RNA polymerase is not detected; indicating CpaA is actively secreted by *A. nosocomialis*.

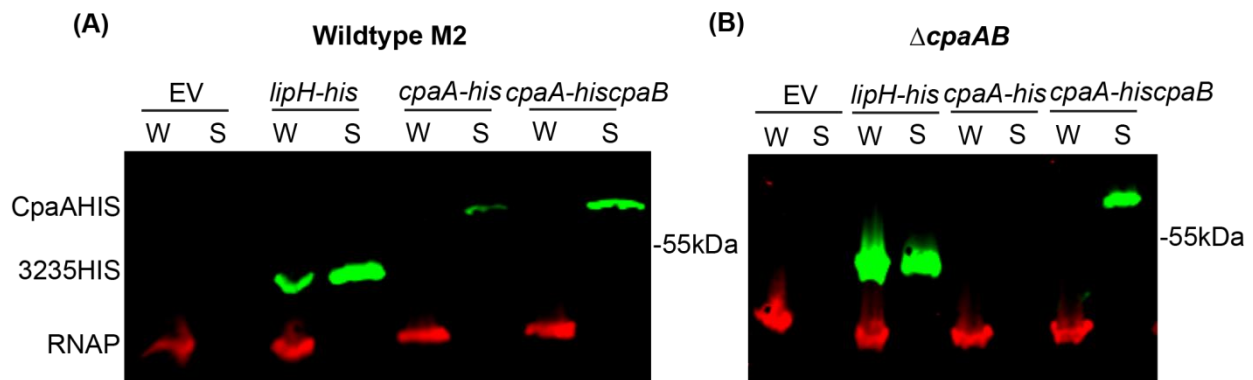

**Figure S2- M2 CpaB is Required for Secretion of CpaA-His but Deletion of *cpaA* and *cpaB* does Not Affect Secretion of Type II Substrate LipH-His.** Western blot analysis on whole cell (W) and cell free supernatant (S) fractions of (A) wildtype M2 or (B)  $\Delta cp a A B$  M2 expressing empty vector, pWH-*lipH-his*, pWH-*cpaA-his*, or pWH-*cpaA-hiscpaB* probing for CpaA-His or LipH-His. All strains and fractions were probed for RNA polymerase as a cell lysis control. CpaA-His secretion was detected in strains carrying pWH-*cpaA-his* or pWH-*cpaA-hiscpaB*. CpaA-His secretion was only detected in cells expressing *cpaB*. LipH-His expression and secretion was detected in cells carrying pWH-*lipH-his*. CpaA and CpaB are not required for secretion of type II substrate LipH. CpaB is required for secretion of CpaA.

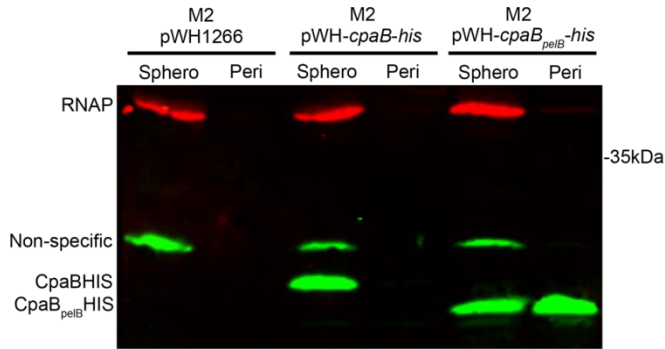

**Figure S3- Replacement of the N-terminal Transmembrane Domain of CpaB with a Sec Secretion Signal Results in a Soluble Periplasmic Construct of CpaB.** Western blot analysis on M2 cells fractionated into the periplasm (peri) or spheroplast (sphero) expressing empty vector, pWH-*cpaB*-his or pWH-*cpaB*<sub>pelB</sub>-his probing for CpaB-His and RNA polymerase as a lysis control. CpaB-His is detected in the spheroplast fraction of the cells expressing full length CpaB. CpaB-His is detected in the spheroplast and periplasmic fractions of cells expressing the soluble *cpaB*<sub>pelB</sub> construct where the N-terminal transmembrane domain has been replaced with a Sec secretion signal.

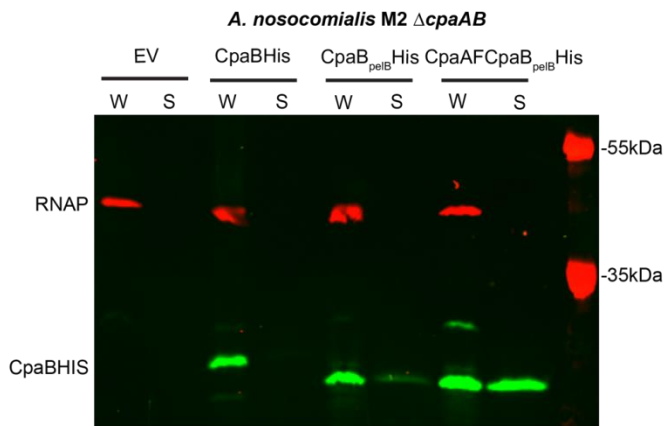

**Figure S4- CpaA is Required for Efficient Secretion of Soluble Periplasmic CpaB.** Western blot analysis on whole cell (W) and cell free supernatant (S) fractions of  $\Delta$ *cpaAB* M2 expressing empty vector, pWH-*cpaB*-his, pWH-*cpaB*<sub>pelB</sub>-his or pWH-*cpaB*<sub>pelB</sub>-his and pBAV-*cpaA*-flag was probed for CpaB-His. All fractions were probed for RNA polymerase as a lysis control. CpaB-His was detected in all cells carrying pWH-*cpaB*-his or pWH-*cpaB*<sub>pelB</sub>-his. A low level of CpaB-His secretion was detected in the absence of CpaA in cells carrying pWH-*cpaB*<sub>pelB</sub>-his. Cells carrying pBAV-*cpaA*-flag efficiently secreted CpaB-His when compared to cells devoid of CpaA.

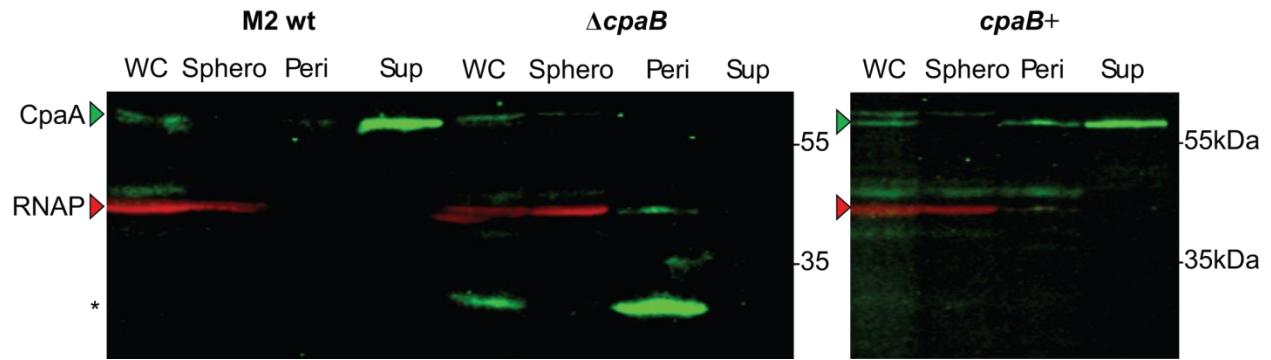

**Figure S5-CpaA is Unstable and Degraded in the Periplasm in the Absence of CpaB.** Whole cells (WC), spheroplasts (sphero), periplasmic (peri) and supernatant (sup) preparations of *A. nosocomialis* M2 wildtype (wt),  $\Delta cp a B$  mutant, and *cpaB*<sup>+</sup> complemented strains were analyzed by Western blot using anti-CpaA polyclonal antibodies. RNA polymerase was used as a lysis control. The asterisk indicates the proteolytic fragment derived from CpaA.

**Supplemental Table 1**

Plasmids and bacterial strains used in this study

| Description                                                           | Source     |
|-----------------------------------------------------------------------|------------|
| <b>Plasmids</b>                                                       |            |
| pBAVMCS                                                               | (50)       |
| pBAV- <i>cpaA-flag</i>                                                | This study |
| pET28a                                                                | Novagen    |
| pET28a- <i>cpaB-his</i>                                               | This study |
| pETDUET                                                               | Novagen    |
| pETDUET- <i>cpaA-his-CpaB</i>                                         | This study |
| pFLP2                                                                 | (51)       |
| pGEM- <i>cpaA::kansacB</i>                                            | This study |
| pGEM- <i>cpaAB::kansacB</i>                                           | This study |
| pRSM4063                                                              | (44)       |
| pRSM4063- <i>pcpaA</i>                                                | This study |
| pWH1266                                                               | (52)       |
| pWH- <i>cpaA-his</i>                                                  | (28)       |
| pWH- <i>cpaA-his-cpaB</i>                                             | (28)       |
| pWH- <i>lipH-his</i>                                                  | (28)       |
| pWH- <i>cpaA-flag-cpaB</i>                                            | This study |
| pWH- <i>cpaA-flag-cpaB-his</i>                                        | This study |
| pWH- <i>cpaB-his</i>                                                  | This study |
| pWH- <i>cpaB-pelB-his</i>                                             | This study |
| <b>Strains</b>                                                        |            |
| <i>A. nosocomialis</i> M2                                             | (38, 53)   |
| <i>A. nosocomialis</i> M2 $\Delta$ <i>gspD::frt</i>                   | (28)       |
| <i>A. nosocomialis</i> M2 $\Delta$ <i>cpaB::frt</i>                   | (28)       |
| <i>A. nosocomialis</i> M2 $\Delta$ <i>cpaA::frt</i>                   | This study |
| <i>A. nosocomialis</i> M2 $\Delta$ <i>cpaAB::frt</i>                  | This study |
| <i>A. nosocomialis</i> M2 $\Delta$ <i>cpaA::frt</i> ( <i>cpaAB+</i> ) | This study |
| <i>E. coli</i> Rosetta 2                                              | Novagen    |
| <i>A. baumannii</i> RUH134                                            | (54)       |
| <i>A. baylyi</i> ADPI                                                 | (55)       |
| <i>A. baumannii</i> SDF                                               | (56)       |
| <i>A. baumannii</i> AYE                                               | (56)       |
| <i>A. baumannii</i> AB5075                                            | (57)       |
| <i>A. baumannii</i> AB04                                              | (58)       |
| <i>A. baumannii</i> AB004                                             | (29)       |
| <i>A. baumannii</i> AB005                                             | (29)       |
| <i>A. baumannii</i> AB006                                             | (29)       |
| <i>A. baumannii</i> AB007                                             | (29)       |
| <i>A. baumannii</i> AB008                                             | (29)       |
| <i>A. baumannii</i> AB009                                             | (29)       |
| <i>A. baumannii</i> AB010                                             | (29)       |
| <i>A. baumannii</i> AB011                                             | (29)       |
| <i>A. baumannii</i> AB012                                             | (29)       |
| <i>A. baumannii</i> AB013                                             | (29)       |

|                               |      |
|-------------------------------|------|
| <i>A. baumannii</i> AB014     | (29) |
| <i>A. baumannii</i> AB033     | (29) |
| <i>A. baumannii</i> AB034     | (29) |
| <i>A. baumannii</i> AB028     | (29) |
| <i>A. pittii</i> 31205        | (59) |
| <i>A. calcoaceticus</i> 27693 | (59) |
| <i>A. pittii</i> 28207        | (59) |
| <i>A. pittii</i> 30005        | (59) |
| <i>A. pittii</i> 31975        | (59) |
| <i>A. pittii</i> 31357        | (59) |
| <i>A. pittii</i> 33632        | (59) |
| <i>A. pittii</i> 32493        | (59) |
| <i>A. nosocomialis</i> 26959  | (59) |
| <i>A. nosocomialis</i> 33904  | (59) |

---

Primers used in this study

| Description              | Sequence                                                                                                                                                                                                                                                                                                                                                                                               |
|--------------------------|--------------------------------------------------------------------------------------------------------------------------------------------------------------------------------------------------------------------------------------------------------------------------------------------------------------------------------------------------------------------------------------------------------|
| petDuetfwinfuse          | GA <sub>2</sub> T <sub>2</sub> CGAGCTCG <sub>2</sub> (CG) <sub>2</sub> C <sub>2</sub> TGCAG                                                                                                                                                                                                                                                                                                            |
| petDuetrevinfuse         | GCTGC <sub>3</sub> ATG <sub>2</sub> (TA) <sub>2</sub> TCTC <sub>2</sub> T <sub>2</sub> C                                                                                                                                                                                                                                                                                                               |
| CpaBcyto revKpnI         | (AT) <sub>2</sub> G <sub>2</sub> TAC <sub>3</sub> TATG <sub>2</sub> ATGATC(ATG) <sub>2</sub> TA <sub>2</sub> CTC <sub>2</sub>                                                                                                                                                                                                                                                                          |
| CpaBcyto fwNdeI          | (AT) <sub>2</sub> C(AT) <sub>2</sub> GATGCAGCA <sub>3</sub> GT <sub>2</sub> CT <sub>2</sub> CTGCT <sub>3</sub> A <sub>2</sub> CG                                                                                                                                                                                                                                                                       |
| CpaAcyto fwduet15bp      | (TA) <sub>2</sub> C <sub>2</sub> ATG <sub>3</sub> CAGCATG <sub>2</sub> CA <sub>2</sub> C <sub>2</sub> G TACTGT(CA) <sub>2</sub> A <sub>3</sub> TCAG                                                                                                                                                                                                                                                    |
| CpaAcyto Hisrevduet15bp  | GC <sub>2</sub> GAGCTCGA <sub>2</sub> T <sub>2</sub> CT <sub>2</sub> AGTG <sub>2</sub> TGATGATG <sub>2</sub> TGATG <sub>2</sub> T <sub>2</sub> A(TA) <sub>2</sub> (GA) <sub>2</sub> A <sub>2</sub> T <sub>6</sub> GTGC                                                                                                                                                                                 |
| 5100fwbamhI              | (AT) <sub>2</sub> G <sub>2</sub> ATC <sub>2</sub> ATG <sub>2</sub> TGA <sub>2</sub> T <sub>4</sub> A <sub>3</sub> T <sub>2</sub> A <sub>5</sub> CATCAC                                                                                                                                                                                                                                                 |
| 5100flagrevpstI          | (AT) <sub>2</sub> CTGCAGT <sub>2</sub> ACT <sub>2</sub> ATCGTCGTCATC <sub>2</sub> T <sub>2</sub> GTA <sub>2</sub> TCGT <sub>2</sub> ATATAG<br>AGA <sub>3</sub> T <sub>6</sub> GTG                                                                                                                                                                                                                      |
| KmsacB2rev               | TGTAG <sub>2</sub> CTG <sub>2</sub> AGCTGCT <sub>2</sub> CG                                                                                                                                                                                                                                                                                                                                            |
| KmsacB1fw                | AT <sub>2</sub> C <sub>2</sub> G <sub>4</sub> ATC <sub>2</sub> GTTCGAC <sub>2</sub>                                                                                                                                                                                                                                                                                                                    |
| 3510015bppgem2rev        | (CG) <sub>2</sub> A <sub>2</sub> T <sub>2</sub> CACTAGTCGC <sub>2</sub> T <sub>2</sub> GCAG <sub>2</sub> T <sub>2</sub> G(CA) <sub>2</sub> GACT <sub>2</sub> CAC                                                                                                                                                                                                                                       |
| 3510015bpkmsacB2fw       | CAGCTC <sub>2</sub> AGC <sub>2</sub> TACATA <sub>2</sub> T(CT) <sub>2</sub> AT <sub>5</sub> AGCTGTA <sub>3</sub> TA <sub>2</sub> TG                                                                                                                                                                                                                                                                    |
| 5510015bpkmsacBrev       | ACG <sub>2</sub> ATC <sub>4</sub> G <sub>2</sub> A <sub>2</sub> T(CA) <sub>2</sub> G TACG <sub>2</sub> TCT <sub>4</sub> AT <sub>3</sub> GT <sub>5</sub> AG                                                                                                                                                                                                                                             |
| 5510015bppgem1fw         | C <sub>2</sub> G <sub>2</sub> C <sub>2</sub> GC <sub>2</sub> ATG <sub>2</sub> CGACGC <sub>2</sub> A <sub>2</sub> TGAT <sub>2</sub> GATCTG <sub>2</sub> A <sub>2</sub> T <sub>2</sub> G                                                                                                                                                                                                                 |
| 6cpaABpromrev            | AGTAGC <sub>2</sub> TCT <sub>4</sub> AT <sub>3</sub> GT <sub>5</sub> AGAT <sub>4</sub> CG                                                                                                                                                                                                                                                                                                              |
| 5CpaAFLAGrev             | T <sub>2</sub> ACT <sub>2</sub> ATC(GTC) <sub>2</sub> ATC <sub>2</sub> T <sub>2</sub> GTA <sub>2</sub> TCGT(TA) <sub>3</sub> (GA) <sub>2</sub> A <sub>2</sub> T <sub>6</sub> GTGC                                                                                                                                                                                                                      |
| 3cpaApromfw pwh1         | (ACT) <sub>2</sub> ) <sub>2</sub> CTGACA <sub>2</sub> CGATCGCTA(TC) <sub>2</sub> AGC <sub>2</sub> AT <sub>3</sub> GT <sub>3</sub> CT <sub>2</sub> C <sub>2</sub> TG                                                                                                                                                                                                                                    |
| 2Pwhrev1                 | T <sub>2</sub> GTCAGA <sub>2</sub> GTA <sub>2</sub> GT <sub>2</sub> G <sub>2</sub> C <sub>2</sub> G                                                                                                                                                                                                                                                                                                    |
| 1Pwhfw2                  | GAG <sub>2</sub> AC <sub>2</sub> GA <sub>2</sub> G <sub>2</sub> AGCTA <sub>2</sub> C <sub>2</sub> GC                                                                                                                                                                                                                                                                                                   |
| 9CpaBnoTmpeI B15bppromfw | ATA <sub>4</sub> GAG <sub>2</sub> CTACTCGATCGATGA <sub>3</sub> TAC <sub>2</sub> (TGC) <sub>2</sub> CGAC <sub>2</sub> (GCT) <sub>3</sub> G <sub>2</sub> T<br>C(TGC) <sub>2</sub> TC <sub>2</sub> TCGCTGC <sub>3</sub> AGC <sub>2</sub> G <sub>2</sub> CGATG <sub>2</sub> C <sub>2</sub> ATGT(CA) <sub>2</sub> GCA <sub>3</sub> GT <sub>2</sub> C<br>T <sub>2</sub> CTGCT <sub>3</sub> A <sub>2</sub> CG |
| 8CpaBHisrevpwh2          | GCTC <sub>2</sub> T <sub>2</sub> CG <sub>2</sub> (TC) <sub>2</sub> GATCGCTA <sub>2</sub> (TGA) <sub>2</sub> (TGG) <sub>3</sub> TG(ATG) <sub>2</sub> TG <sub>2</sub> ATG<br>ATC(ATG) <sub>2</sub> TA <sub>2</sub> CTC <sub>2</sub> TG                                                                                                                                                                   |
| 7CpaBfwpromoverhang      | ATA <sub>4</sub> GAG <sub>2</sub> CTACT <sub>2</sub> CTCTAT <sub>5</sub> AGCTGTA <sub>3</sub> TA <sub>2</sub> TGA <sub>2</sub> G                                                                                                                                                                                                                                                                       |
| 11CpaBfw15bpcpaAF        | (GAC) <sub>2</sub> GATA <sub>2</sub> GTA <sub>2</sub> T <sub>2</sub> (CT) <sub>2</sub> AT <sub>5</sub> AGCTGTA <sub>3</sub> TA <sub>2</sub> TGA <sub>2</sub> G                                                                                                                                                                                                                                         |
| cpaBrevNT15bppwh2        | GCTC <sub>2</sub> T <sub>2</sub> CG <sub>2</sub> (TCC) <sub>2</sub> TATG <sub>2</sub> ATGATC(ATG) <sub>2</sub> TA <sub>2</sub> CTC <sub>2</sub>                                                                                                                                                                                                                                                        |
| cpaABKOdw15bppgemrev4    | (CG) <sub>2</sub> A <sub>2</sub> T <sub>2</sub> CACTAGTA <sub>2</sub> GCTA <sub>2</sub> CTCATGTA <sub>2</sub> TGT <sub>2</sub> GA <sub>3</sub> TG                                                                                                                                                                                                                                                      |
| cpaABKOdw15bpkmsacBfw3   | CAGCTC <sub>2</sub> AGC <sub>2</sub> TACATAGAG <sub>2</sub> A <sub>2</sub> TA <sub>3</sub> TGAT <sub>4</sub> G <sub>2</sub> TAG <sub>3</sub>                                                                                                                                                                                                                                                           |
| cpaABKOup15bppgemfw2     | C <sub>2</sub> G <sub>2</sub> C <sub>2</sub> GC <sub>2</sub> ATG <sub>2</sub> CGTCTACAGTAG <sub>2</sub> TG <sub>2</sub> CG <sub>2</sub> TG                                                                                                                                                                                                                                                             |
| CpaABkoup15bpkmsacBrev1  | ACG <sub>2</sub> ATC <sub>4</sub> G <sub>2</sub> A <sub>2</sub> T <sub>2</sub> A <sub>2</sub> GCAC <sub>3</sub> A <sub>2</sub> CTA(TG) <sub>2</sub> CATAGC                                                                                                                                                                                                                                             |
| kpnIcpaABrevlocus        | (AT) <sub>2</sub> G <sub>2</sub> TAC <sub>2</sub> AC <sub>2</sub> T(AC) <sub>2</sub> CA(CG) <sub>2</sub> T <sub>2</sub> C <sub>2</sub> TGTA <sub>3</sub> TA <sub>3</sub> TA <sub>2</sub> GC                                                                                                                                                                                                            |
| pstIcpaABfwlocus         | (AT) <sub>2</sub> CTGCAGCTA(TC) <sub>2</sub> AGC <sub>2</sub> AT <sub>3</sub> GT <sub>3</sub> CT <sub>2</sub> C <sub>2</sub> TGT <sub>2</sub> A <sub>2</sub> CTG                                                                                                                                                                                                                                       |
| Pet28ahisfw              | CAC <sub>2</sub> (ACC) <sub>4</sub> ACT(GA) <sub>2</sub> T                                                                                                                                                                                                                                                                                                                                             |
| Pet28auprev              | CATG <sub>2</sub> (TA) <sub>2</sub> (TC) <sub>2</sub> (CTT) <sub>2</sub> A <sub>3</sub> GT                                                                                                                                                                                                                                                                                                             |
| CytocpaBrev              | (GTG) <sub>5</sub> TG <sub>2</sub> ATGATC(ATG) <sub>2</sub> TA <sub>2</sub> CTC <sub>2</sub> TG                                                                                                                                                                                                                                                                                                        |
| CytoCpaBfw               | AG <sub>2</sub> AGA(TA) <sub>2</sub> C <sub>2</sub> AT(GCA) <sub>2</sub> A <sub>2</sub> GT <sub>2</sub> CT <sub>2</sub> CTGCT <sub>3</sub> A <sub>2</sub> CG                                                                                                                                                                                                                                           |
